# Supplementary material
Source: publisher site journal article supplement (https://www.dovepress.com/article/390113)
Supplement: Supplementary file 1 [file get_supplementary_file.php]

**Materials and Methods**

***In vitro* drug sensitivity assay**

The Bleomycin, Simvastatin and Zoledronate were transfected into Huh-1 and Hep3b cells. Briefly, 5*103 cell were seeded into 96-well plate and medium containing drugs

was added into each well. Then, the cells were treated with Bleomycin (0, 0.5, 1, 2, 4, 8, 16, 32, 64 and 128 μM/L), Simvastatin (0, 1, 2, 4, 8, 16, 32, 64 and 128 μM/L) or Zoledronate (0, 1, 2, 4, 8, 16, 32, 64 and 128 μM/L). Finally, the Cell Counting Kit-8 (CCK8) assay was performed. The inhibition rates and IC50 values were then calculated.

**Supplementary Figures**


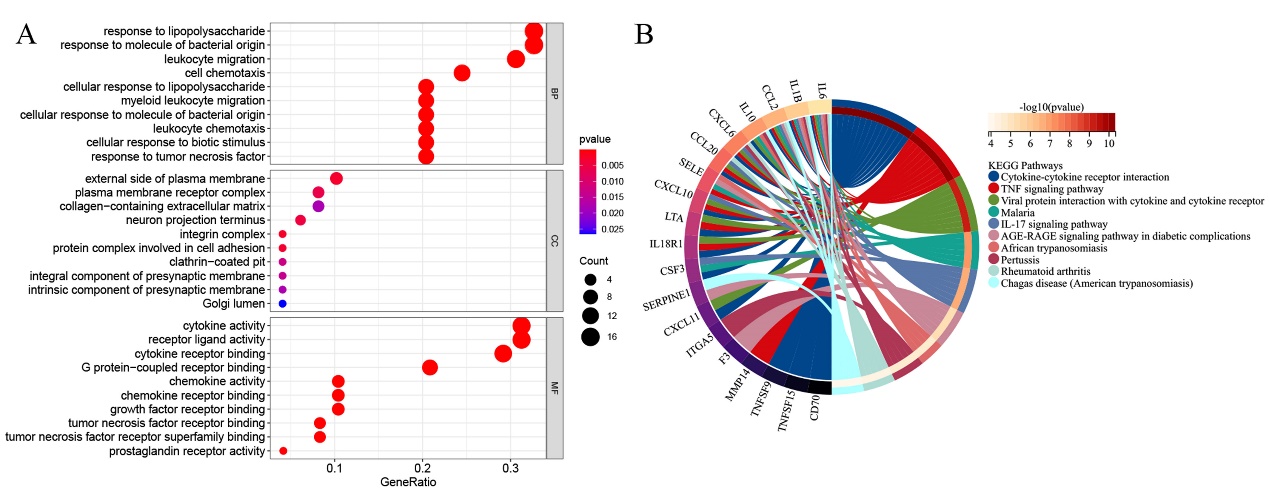


Figure S1. Kyoto Encyclopedia of Genes and Genomes (KEGG) and Gene Ontology (GO) analysis for 49 overlapped differentially expressed genes in TCGA. (A). GO data. (B). KEGG pathways.


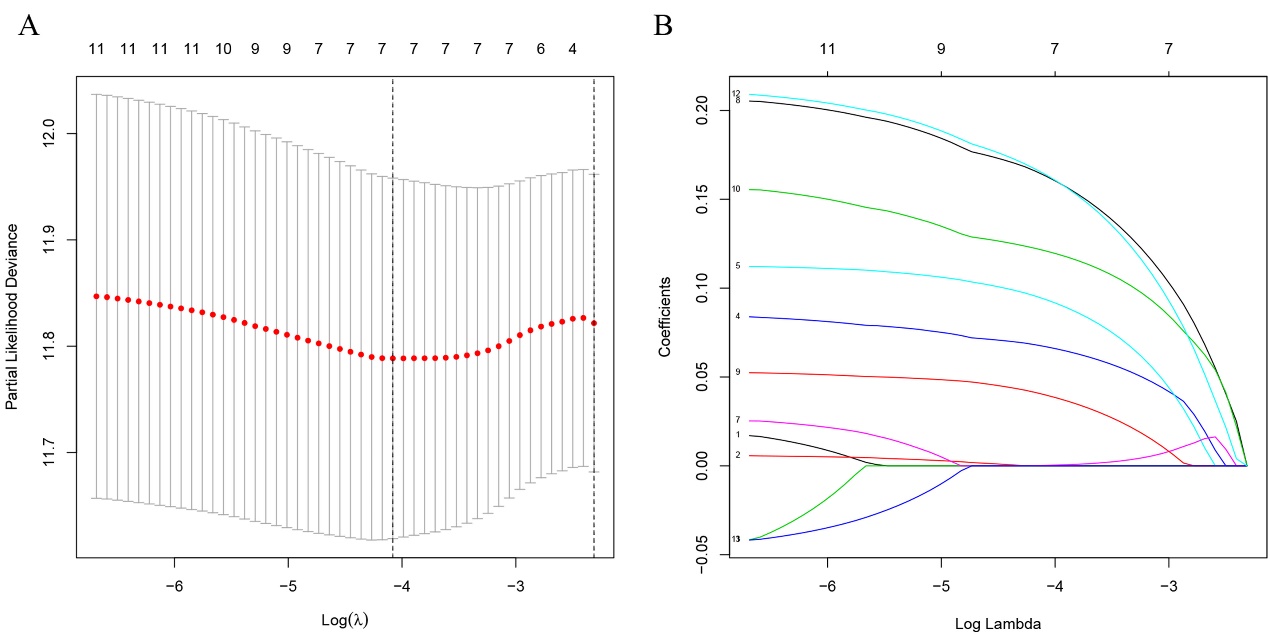


Figure S2. Constructed a seven-gene model from the TCGA cohort. (A) LASSO coefficient expression profiles of 11 candidate genes. (B)The penalty parameter (λ) in the LASSO model was selected through ten cross-validation.


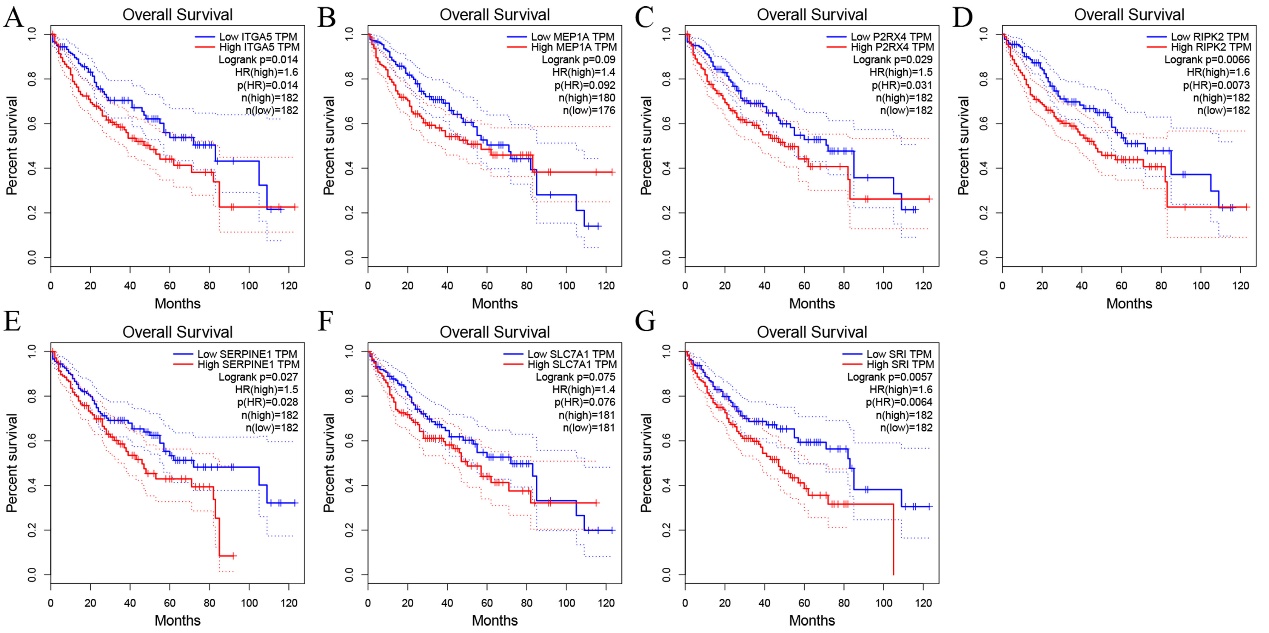


Figure S3. Kaplan-Meier analysis of the ITGA5(A), MEP1A(B), P2RX4(C), RIPK2(D), SERPINE1(E), SLC7A1(F) and SRI(G) gene different expression levels for overall survival with HCC patients (red: high, blue: low) in TCGA.


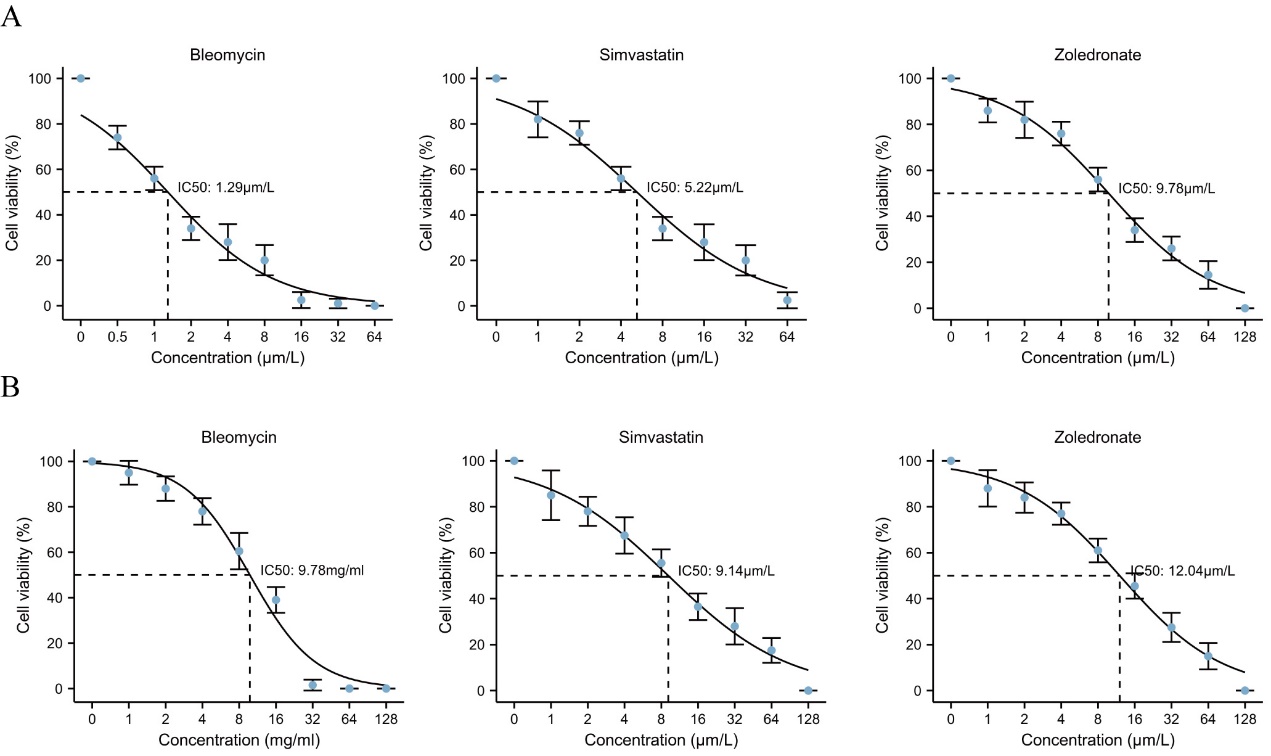


Figure S4. Bleomycin, Simvastatin and Zoledronate regulates drug sensitivity of HCC cell lines. (A) The IC50 value of Huh-1 cell after 3 drugs treatment was 1.29, 5.22 and 9.78μm/L. (B) The IC50 value of Hep3b cell after 3 drugs treatment was 9.78, 9.14, 12.04 μm/L.


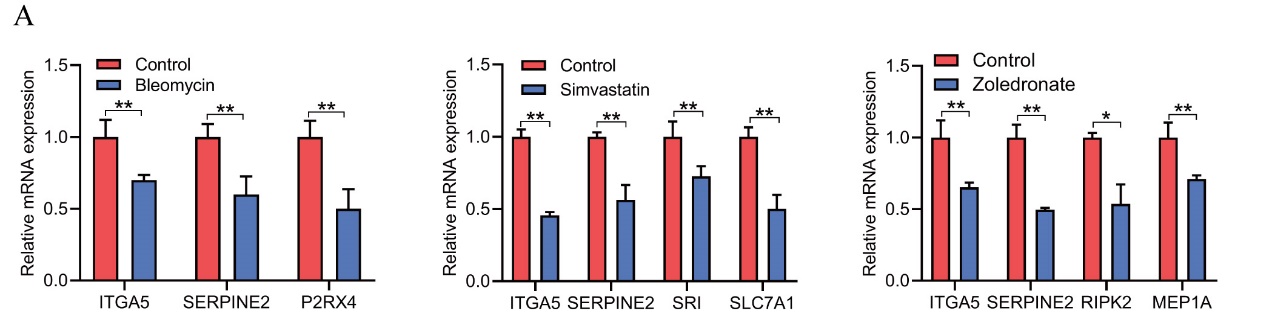


Figure S5. Bleomycin, Simvastatin and Zoledronate regulated 7 genes expression in HCC cells. (A). The expression levels of ITGA5, SERPINE2 and P2RX4 were examined after Bleomycin treatment. (B). The expression levels of ITGA5, SERPINE2 SRI and SLC7A1 were examined after Bleomycin treatment. (C). The expression levels of ITGA5, SERPINE2, RIPK2 and MEP1A were detected after Zoledronate. **P* < 0.05, ***P* < 0.01.

**Supplementary Table 1. Potential drugs involved in HCC from TCGA.**

| Gene | Drug | cor | pvalue |
| --- | --- | --- | --- |
| ITGA5 | Bleomycin | -0.496035 | 5.57E-05 |
| SERPINE1 | Tamoxifen | 0.48479 | 9.98E-05 |
| SERPINE1 | Vorinostat | 0.47973 | 0.000121 |
| SERPINE1 | Bleomycin | -0.461649 | 0.000205 |
| ITGA5 | Zoledronate | -0.449141 | 0.000405 |
| SERPINE1 | Lenvatinib | -0.433004 | 0.000858 |
| SERPINE1 | Nilotinib | 0.42014 | 0.000924 |
| RIPK2 | Pipobroman | 0.41603 | 0.000946 |
| MEP1A | Zoledronate | -0.436305 | 0.001538 |
| ITGA5 | Idelalisib | -0.401234 | 0.001799 |
| SRI | Mithramycin | 0.38228 | 0.002576 |
| SERPINE1 | Midostaurin | -0.380173 | 0.002733 |
| SERPINE1 | Dasatinib | -0.381913 | 0.002838 |
| RIPK2 | Lomustine | 0.38045 | 0.002955 |
| ITGA5 | Simvastatin | -0.448673 | 0.003258 |
| RIPK2 | DECITABINE | 0.41948 | 0.003335 |
| RIPK2 | Nelarabine | 0.38077 | 0.003791 |
| ITGA5 | RAPAMYCIN | -0.364466 | 0.004197 |
| SERPINE1 | Estramustine | 0.36666 | 0.004285 |
| SRI | Paclitaxel | 0.3608 | 0.004626 |
| ITGA5 | Tamoxifen | 0.36369 | 0.004633 |
| SERPINE1 | Paclitaxel | 0.35844 | 0.004922 |
| SERPINE1 | Pazopanib | -0.360919 | 0.004981 |
| RIPK2 | Carmustine | 0.35593 | 0.005253 |
| SERPINE1 | Simvastatin | -0.425929 | 0.005494 |
| SLC7A1 | Simvatatin | -0.354594 | 0.005859 |
| ITGA5 | Gemcitabine | -0.351419 | 0.005901 |
| ITGA5 | LDK-378 | 0.35703 | 0.005938 |
| SRI | Fluorouracil | 0.35092 | 0.005976 |
| SLC7A1 | Erlotinib | 0.35376 | 0.005984 |
| RIPK2 | Melphalan | 0.35037 | 0.006061 |
| P2RX4 | Eribulin mesilate | 0.34816 | 0.006411 |
| SRI | Tegafur | 0.34681 | 0.007652 |
| MEP1A | Tegafur | -0.345502 | 0.0079 |
| ITGA5 | Cabozantinib | -0.345482 | 0.007904 |
| ITGA5 | Rapamycin | -0.347334 | 0.008116 |
| P2RX4 | Cladribine | -0.340588 | 0.008301 |
| SERPINE1 | VINORELBINE | 0.34615 | 0.008351 |
| P2RX4 | Ponatinib | 0.33935 | 0.008556 |
| RIPK2 | Etoposide | 0.33603 | 0.008667 |
| ITGA5 | IPI-145 | -0.341558 | 0.00869 |
| SERPINE1 | Zoledronate | -0.340159 | 0.008986 |
| ITGA5 | Temsirolimus | -0.336961 | 0.009696 |
| RIPK2 | Tamoxifen | 0.32968 | 0.010777 |
| P2RX4 | brigatinib | 0.32911 | 0.010921 |
| ITGA5 | Cisplatin | -0.325033 | 0.011279 |
| SERPINE1 | RAPAMYCIN | -0.323551 | 0.011678 |
| RIPK2 | DACARBAZINE | 0.32142 | 0.012274 |
| RIPK2 | Teniposide | 0.31707 | 0.013572 |
| RIPK2 | Asparaginase | 0.31435 | 0.014441 |
| P2RX4 | Vorinostat | -0.31344 | 0.015635 |
| RIPK2 | Cyclophosphamide | 0.35009 | 0.015848 |
| SERPINE1 | Vemurafenib | 0.31251 | 0.015963 |
| SRI | Simvastatin | -0.371478 | 0.016787 |
| RIPK2 | Thiotepa | 0.30589 | 0.017459 |
| RIPK2 | Bendamustine | 0.31777 | 0.01807 |
| SERPINE1 | Selumetinib | 0.30528 | 0.018715 |
| P2RX4 | Carfilzomib | 0.3046 | 0.018996 |
| P2RX4 | Vinorelbine | 0.30967 | 0.019072 |
| SERPINE1 | Abiraterone | -0.368409 | 0.019331 |
| P2RX4 | Dasatinib | 0.30327 | 0.019549 |
| ITGA5 | JNJ-42756493 | -0.307509 | 0.019971 |
| P2RX4 | Gemcitabine | -0.299282 | 0.02018 |
| P2RX4 | Bleomycin | -0.301198 | 0.02044 |
| ITGA5 | Everolimus | -0.301058 | 0.020502 |
| SERPINE1 | JNJ-42756493 | -0.305809 | 0.020702 |
| ITGA5 | Midostaurin | -0.296269 | 0.021534 |
| RIPK2 | DAUNORUBICIN | 0.29795 | 0.021906 |
| SERPINE1 | Dabrafenib | 0.31915 | 0.022446 |
| RIPK2 | Dexamethasone Decadron | 0.33556 | 0.024229 |
| P2RX4 | Depsipeptide | 0.28814 | 0.025576 |
| P2RX4 | Fulvestrant | -0.292155 | 0.026058 |
| MEP1A | Paclitaxel | -0.286965 | 0.026212 |
| RIPK2 | Triethylenemelamine | 0.28673 | 0.026343 |
| SERPINE1 | MITOXANTRONE | -0.285961 | 0.026765 |
| SRI | Isotretinoin | 0.28789 | 0.02703 |
| ITGA5 | MITOXANTRONE | -0.285115 | 0.027238 |
| ITGA5 | Palbociclib | 0.28591 | 0.02815 |
| SERPINE1 | Homoharringtonine | 0.32002 | 0.028314 |
| SERPINE1 | Tegafur | 0.28807 | 0.02832 |
| MEP1A | Megestrol acetate | -0.28802 | 0.028348 |
| SERPINE1 | Raloxifene | 0.28534 | 0.028479 |
| SERPINE1 | Crizotinib | 0.28501 | 0.028673 |
| RIPK2 | Uracil mustard | 0.28238 | 0.028818 |
| SRI | pralatrexate | -0.289223 | 0.029104 |
| SLC7A1 | Gefitinib | 0.28403 | 0.029251 |
| ITGA5 | Pazopanib | -0.283967 | 0.029286 |
| RIPK2 | Irinotecan | 0.28119 | 0.029526 |
| SRI | Actinomycin D | 0.28064 | 0.029861 |
| RIPK2 | Paclitaxel | 0.27828 | 0.031322 |
| SLC7A1 | Pipamperone | -0.280077 | 0.031675 |
| MEP1A | Dasatinib | 0.28001 | 0.031716 |
| ITGA5 | NMS-E628 | 0.28132 | 0.032417 |
| SERPINE1 | Everolimus | -0.276889 | 0.033752 |
| RIPK2 | Zoledronate | -0.279237 | 0.033776 |
| RIPK2 | Raltitrexed | 0.29483 | 0.033858 |
| P2RX4 | Mithramycin | 0.2724 | 0.035235 |
| SRI | Digoxin | 0.28191 | 0.035295 |
| RIPK2 | Doxorubicin | 0.27176 | 0.035685 |
| RIPK2 | Sonidegib | -0.273091 | 0.036373 |
| SLC7A1 | Fludarabine | -0.277858 | 0.036375 |
| RIPK2 | Chlorambucil | 0.2706 | 0.036516 |
| SERPINE1 | Panobinostat | 0.27262 | 0.036711 |
| SERPINE1 | Cobimetinib (isomer 1) | 0.27497 | 0.036712 |
| RIPK2 | Carboplatin | 0.26908 | 0.037624 |
| SERPINE1 | Ixabepilone | 0.28562 | 0.038157 |
| RIPK2 | BMN-673 | 0.2725 | 0.038505 |
| SLC7A1 | Sonidegib | 0.26972 | 0.038839 |
| P2RX4 | 7-Ethyl-10-hydroxycamptothecin | -0.266411 | 0.039634 |
| SLC7A1 | Acalabrutinib | 0.27077 | 0.039799 |
| RIPK2 | Nitrogen mustard | 0.26254 | 0.042707 |
| RIPK2 | Arsenic trioxide | 0.26213 | 0.044897 |
| ITGA5 | Tegafur | 0.26414 | 0.045117 |
| ITGA5 | Olaparib | -0.270042 | 0.046164 |
| RIPK2 | TYROTHRICIN | 0.26053 | 0.046274 |
| ITGA5 | Abiraterone | -0.31687 | 0.046351 |
| SERPINE1 | Fulvestrant | 0.26241 | 0.046595 |
| SERPINE1 | Belinostat | 0.25891 | 0.047695 |
| MEP1A | Cabozantinib | 0.26113 | 0.047716 |
| RIPK2 | Epirubicin | 0.26307 | 0.048033 |
| SRI | Docetaxel | 0.28158 | 0.049996 |

**Supplementary Table 2. Primers for Real-Time PCR**

| Name | Sequences |
| --- | --- |
| ITGA5 sense: | 5'- AGAGCTACGGGCCA AGCTAA -3' |
| ITGA5 antisense: | 5'- TTCCCCATAAAGTTTGGTCCAC -3' |
| MEP1A sense: | 5'- TTTACCTTGCTTTTTGCCCACA -3' |
| MEP1A antisense: | 5'- TGTCCCCTTGAAAGAGGTCCA -3' |
| P2RX4 sense: | 5'- ACAACGTGTCTCCTGGCTACAAT -3' |
| P2RX4 antisense: | 5'- GTCAAACTTGCCAGCCTTTCC -3' |
| RIPK2 sense: | 5'- TCAAGGGCCAGTATCAAGCACGA -3' |
| RIPK2 antisense: | 5'- ATCATACGTGCTCGGTGAGGT -3' |
| SERPINE1 sense: | 5'-TGCTGGTGAATGCCCTCTACT-3' |
| SERPINE1 antisense: | 5'-CGGTCATTCCCAGGTTCTCTA-3' |
| SLC7A1 sense: | 5'-TCTCCAAAGGAGGTTACCTGC-3' |
| SLC7A1 antisense: | 5'-AGACTCCCCTCAGTAAAGTGAC-3' |
| SRI sense: | 5'-GCACCAGCGGGAAGATCA -3' |
| SRI antisense: | 5'-TGAGAGCCCTCAGTTTGACACA-3' |
| ACTB sense: | 5'-TCCCTGGAGAAGAGCTACGA-3' |
| ACTB antisense: | 5'-AGCACTGTGTTGGCGTACAG-3' |

**Supplementary Table 3. Potential drugs involved in HCC from TCGA.**

| **Gene Symbol** | **Gene Description** |
| --- | --- |
| ABCA1 | ATP binding cassette subfamily A member 1 |
| ABI1 | abl interactor 1 |
| ACVR1B | activin A receptor type 1B |
| ACVR2A | activin A receptor type 2A |
| ADM | adrenomedullin |
| ADORA2B | adenosine A2b receptor |
| ADRM1 | adhesion regulating molecule 1 |
| AHR | aryl hydrocarbon receptor |
| APLNR | apelin receptor |
| AQP9 | aquaporin 9 |
| ATP2A2 | ATPase sarcoplasmic/endoplasmic reticulum Ca2+ transporting 2 |
| ATP2B1 | ATPase plasma membrane Ca2+ transporting 1 |
| ATP2C1 | ATPase secretory pathway Ca2+ transporting 1 |
| AXL | AXL receptor tyrosine kinase |
| BDKRB1 | bradykinin receptor B1 |
| BEST1 | bestrophin 1 |
| BST2 | bone marrow stromal cell antigen 2 |
| BTG2 | BTG anti-proliferation factor 2 |
| C3AR1 | complement C3a receptor 1 |
| C5AR1 | complement C5a receptor 1 |
| CALCRL | calcitonin receptor like receptor |
| CCL17 | C-C motif chemokine ligand 17 |
| CCL2 | C-C motif chemokine ligand 2 |
| CCL20 | C-C motif chemokine ligand 20 |
| CCL22 | C-C motif chemokine ligand 22 |
| CCL24 | C-C motif chemokine ligand 24 |
| CCL5 | C-C motif chemokine ligand 5 |
| CCL7 | C-C motif chemokine ligand 7 |
| CCR7 | C-C motif chemokine receptor 7 |
| CCRL2 | C-C motif chemokine receptor like 2 |
| CD14 | CD14 molecule |
| CD40 | CD40 molecule |
| CD48 | CD48 molecule |
| CD55 | CD55 molecule (Cromer blood group) |
| CD69 | CD69 molecule |
| CD70 | CD70 molecule |
| CD82 | CD82 molecule |
| CDKN1A | cyclin dependent kinase inhibitor 1A |
| CHST2 | carbohydrate sulfotransferase 2 |
| CLEC5A | C-type lectin domain containing 5A |
| CMKLR1 | chemerin chemokine-like receptor 1 |
| CSF1 | colony stimulating factor 1 |
| CSF3 | colony stimulating factor 3 |
| CSF3R | colony stimulating factor 3 receptor |
| CX3CL1 | C-X3-C motif chemokine ligand 1 |
| CXCL10 | C-X-C motif chemokine ligand 10 |
| CXCL11 | C-X-C motif chemokine ligand 11 |
| CXCL6 | C-X-C motif chemokine ligand 6 |
| CXCL9 | C-X-C motif chemokine ligand 9 |
| CXCR6 | C-X-C motif chemokine receptor 6 |
| CYBB | cytochrome b-245 beta chain |
| DCBLD2 | discoidin, CUB and LCCL domain containing 2 |
| EBI3 | Epstein-Barr virus induced 3 |
| EDN1 | endothelin 1 |
| EIF2AK2 | eukaryotic translation initiation factor 2 alpha kinase 2 |
| EMP3 | epithelial membrane protein 3 |
| ADGRE1 | adhesion G protein-coupled receptor E1 |
| EREG | epiregulin |
| F3 | coagulation factor III, tissue factor |
| FFAR2 | free fatty acid receptor 2 |
| FPR1 | formyl peptide receptor 1 |
| FZD5 | frizzled class receptor 5 |
| GABBR1 | gamma-aminobutyric acid type B receptor subunit 1 |
| GCH1 | GTP cyclohydrolase 1 |
| GNA15 | G protein subunit alpha 15 |
| GNAI3 | G protein subunit alpha i3 |
| GP1BA | glycoprotein Ib platelet subunit alpha |
| GPC3 | glypican 3 |
| GPR132 | G protein-coupled receptor 132 |
| GPR183 | G protein-coupled receptor 183 |
| HAS2 | hyaluronan synthase 2 |
| HBEGF | heparin binding EGF like growth factor |
| HIF1A | hypoxia inducible factor 1 subunit alpha |
| HPN | hepsin |
| HRH1 | histamine receptor H1 |
| ICAM1 | intercellular adhesion molecule 1 |
| ICAM4 | intercellular adhesion molecule 4 |
| ICOSLG | inducible T cell costimulator ligand |
| IFITM1 | interferon induced transmembrane protein... |
| IFNAR1 | interferon alpha and beta receptor subun... |
| IFNGR2 | interferon gamma receptor 2 |
| IL10 | interleukin 10 |
| IL10RA | interleukin 10 receptor subunit alpha |
| IL12B | interleukin 12B |
| IL15 | interleukin 15 |
| IL15RA | interleukin 15 receptor subunit alpha |
| IL18 | interleukin 18 |
| IL18R1 | interleukin 18 receptor 1 |
| IL18RAP | interleukin 18 receptor accessory protein |
| IL1A | interleukin 1 alpha |
| IL1B | interleukin 1 beta |
| IL1R1 | interleukin 1 receptor type 1 |
| IL2RB | interleukin 2 receptor subunit beta |
| IL4R | interleukin 4 receptor |
| IL6 | interleukin 6 |
| IL7R | interleukin 7 receptor |
| CXCL8 | C-X-C motif chemokine ligand 8 |
| INHBA | inhibin subunit beta A |
| IRAK2 | interleukin 1 receptor associated kinase 2 |
| IRF1 | interferon regulatory factor 1 |
| IRF7 | interferon regulatory factor 7 |
| ITGA5 | integrin subunit alpha 5 |
| ITGB3 | integrin subunit beta 3 |
| ITGB8 | integrin subunit beta 8 |
| KCNA3 | potassium voltage-gated channel subfamily A member 3 |
| KCNJ2 | potassium inwardly rectifying channel subfamily J member 2 |
| KCNMB2 | potassium calcium-activated channel subfamily M regulatory beta subunit 2 |
| KIF1B | kinesin family member 1B |
| KLF6 | Kruppel like factor 6 |
| LAMP3 | lysosomal associated membrane protein 3 |
| LCK | LCK proto-oncogene, Src family tyrosine kinase |
| LCP2 | lymphocyte cytosolic protein 2 |
| LDLR | low density lipoprotein receptor |
| LIF | LIF interleukin 6 family cytokine |
| LPAR1 | lysophosphatidic acid receptor 1 |
| LTA | lymphotoxin alpha |
| LY6E | lymphocyte antigen 6 family member E |
| LYN | LYN proto-oncogene, Src family tyrosine kinase |
| MARCO | macrophage receptor with collagenous structure |
| MEFV | MEFV innate immuity regulator, pyrin |
| MEP1A | meprin A subunit alpha |
| MET | MET proto-oncogene, receptor tyrosine kinase |
| MMP14 | matrix metallopeptidase 14 |
| MSR1 | macrophage scavenger receptor 1 |
| MXD1 | MAX dimerization protein 1 |
| MYC | MYC proto-oncogene, bHLH transcription factor |
| NAMPT | nicotinamide phosphoribosyltransferase |
| NDP | norrin cystine knot growth factor NDP |
| NFKB1 | nuclear factor kappa B subunit 1 |
| NFKBIA | NFKB inhibitor alpha |
| NLRP3 | NLR family pyrin domain containing 3 |
| NMI | N-myc and STAT interactor |
| NMUR1 | neuromedin U receptor 1 |
| NOD2 | nucleotide binding oligomerization domain containing 2 |
| NPFFR2 | neuropeptide FF receptor 2 |
| OLR1 | oxidized low density lipoprotein receptor 1 |
| OPRK1 | opioid receptor kappa 1 |
| OSM | oncostatin M |
| OSMR | oncostatin M receptor |
| P2RX4 | purinergic receptor P2X 4 |
| P2RX7 | purinergic receptor P2X 7 |
| P2RY2 | purinergic receptor P2Y2 |
| PCDH7 | protocadherin 7 |
| PDE4B | phosphodiesterase 4B |
| PDPN | podoplanin |
| PIK3R5 | phosphoinositide-3-kinase regulatory subunit 5 |
| PLAUR | plasminogen activator, urokinase receptor |
| PROK2 | prokineticin 2 |
| PSEN1 | presenilin 1 |
| PTAFR | platelet activating factor receptor |
| PTGER2 | prostaglandin E receptor 2 |
| PTGER4 | prostaglandin E receptor 4 |
| PTGIR | prostaglandin I2 receptor |
| PTPRE | protein tyrosine phosphatase receptor type E |
| PVR | PVR cell adhesion molecule |
| RAF1 | Raf-1 proto-oncogene, serine/threonine kinase |
| RASGRP1 | RAS guanyl releasing protein 1 |
| RELA | RELA proto-oncogene, NF-kB subunit |
| RGS1 | regulator of G protein signaling 1 |
| RGS16 | regulator of G protein signaling 16 |
| RHOG | ras homolog family member G |
| RIPK2 | receptor interacting serine/threonine kinase 2 |
| RNF144B | ring finger protein 144B |
| ROS1 | ROS proto-oncogene 1, receptor tyrosine kinase |
| RTP4 | receptor transporter protein 4 |
| SCARF1 | scavenger receptor class F member 1 |
| SCN1B | sodium voltage-gated channel beta subunit 1 |
| SELE | selectin E |
| SELL | selectin L |
| SELENOS | selenoprotein S |
| SEMA4D | semaphorin 4D |
| SERPINE1 | serpin family E member 1 |
| SGMS2 | sphingomyelin synthase 2 |
| SLAMF1 | signaling lymphocytic activation molecule family member 1 |
| SLC11A2 | solute carrier family 11 member 2 |
| SLC1A2 | solute carrier family 1 member 2 |
| SLC28A2 | solute carrier family 28 member 2 |
| SLC31A1 | solute carrier family 31 member 1 |
| SLC31A2 | solute carrier family 31 member 2 |
| SLC4A4 | solute carrier family 4 member 4 |
| SLC7A1 | solute carrier family 7 member 1 |
| SLC7A2 | solute carrier family 7 member 2 |
| SPHK1 | sphingosine kinase 1 |
| SRI | sorcin |
| STAB1 | stabilin 1 |
| TACR1 | tachykinin receptor 1 |
| TACR3 | tachykinin receptor 3 |
| TAPBP | TAP binding protein |
| TIMP1 | TIMP metallopeptidase inhibitor 1 |
| TLR1 | toll like receptor 1 |
| TLR2 | toll like receptor 2 |
| TLR3 | toll like receptor 3 |
| TNFAIP6 | TNF alpha induced protein 6 |
| TNFRSF1B | TNF receptor superfamily member 1B |
| TNFRSF9 | TNF receptor superfamily member 9 |
| TNFSF10 | TNF superfamily member 10 |
| TNFSF15 | TNF superfamily member 15 |
| TNFSF9 | TNF superfamily member 9 |
| TPBG | trophoblast glycoprotein |
| VIP | vasoactive intestinal peptide |
